# Supplementary material for: Association of pre- and early-pregnancy factors with the risk for gestational diabetes mellitus in a large Chinese population
Source: PubMed Central journal article supplement (PMC8016847; doi:10.1038/s41598-021-86818-7), 2021-04-01

**Supplementary Table 1.** Assessment of non-random measurement error for clinical biomarkers across the ten “AAA” hospitals.

| <b>Clinical Biomarkers</b>             | <b>ICC (confidence limit)</b> |
|----------------------------------------|-------------------------------|
| Hemoglobin (g/L)                       | 0.03 (0.01 to 0.05)           |
| White cell count ( $10^9/L$ )          | 0.005 (0.00 to 0.01)          |
| Platelet count ( $10^9/L$ )            | 0.03 (0.01 to 0.04)           |
| Alanine transaminase (U/L)             | 0.02 (0.00 to 0.05)           |
| Aspartate aminotransferase (U/L)       | 0.04 (0.02 to 0.06)           |
| Albumin (g/L)                          | 0.07 (0.04 to 0.10)           |
| Direct bilirubin ( $\mu\text{mol/L}$ ) | 0.05 (0.00 to 0.09)           |
| Creatinine ( $\mu\text{mol/L}$ )       | 0.02 (0.01 to 0.04)           |
| Blood urea nitrogen (mmol/L)           | 0.06 (0.02 to 0.10)           |
| OGTT fasting glucose (mmol/L)          | 0.01 (0.00 to 0.02)           |
| OGTT1h glucose (mmol/L)                | 0.01 (0.00 to 0.02)           |
| OGTT2h glucose (mmol/L)                | 0.02 (0.00 to 0.03)           |

Abbreviations: OGTT, oral glucose tolerance test; ICC, intraclass correlation coefficient.

**Supplementary Figure 1.** The calibration curve for the nomogram model.

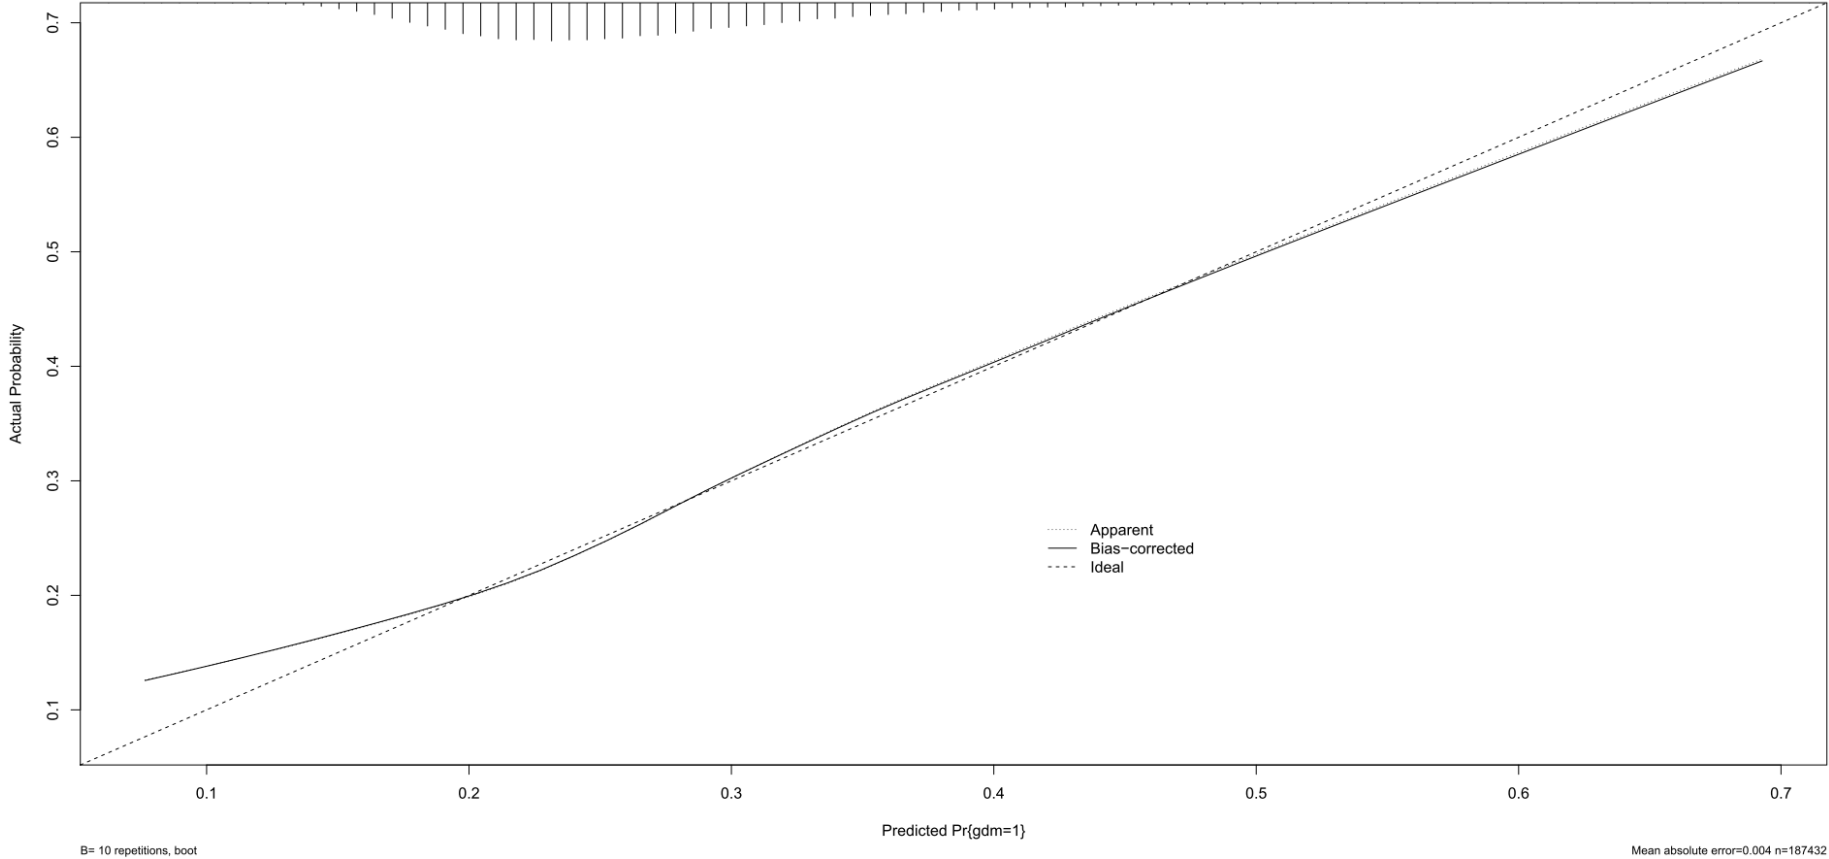

Supplement: 41598_2021_86818_MOESM1_ESM.pdf [file 41598_2021_86818_MOESM1_ESM.pdf]
